# Supplementary material for: Pattern-Recognition Receptor Signaling Regulator mRNA Expression in Humans and Mice, and in Transient Inflammation or Progressive Fibrosis
Source: PubMed Central journal article supplement (PMC3794773; doi:10.3390/ijms140918124), 2013-09-04
Supplement: ijms-14-18124-s001.pdf [file ijms-14-18124-s001.pdf]

## Supplementary Information

**Figure S1.** Human PBMCs were stimulated with 10 ng/mL LPS. Detection of mRNA Expression levels after 4, 12, 18 and 24 h. Red colours illustrate increased expression, green colours illustrate decreased expression compared to controls.

| LPS 10 ng/ml | A20   | CYLD | DUBA | ST2  | CD180 | SIGIRR | TANK  | SOCS1 | SOCS3 | SHIP  | IRAK-M | DOK1 | DOK2  | SHP1 | SHP2 | TOLLIP | IRF4 | SIKE | NLRX1 | ERBIN | CENTB1 | Clec4a2 |
|--------------|-------|------|------|------|-------|--------|-------|-------|-------|-------|--------|------|-------|------|------|--------|------|------|-------|-------|--------|---------|
| 0 hours      | 1.00  | 1.00 | 1.00 | 1.00 | 1.00  | 1.00   | 1.00  | 1.00  | 1.00  | 1.00  | 1.00   | 1.00 | 1.00  | 1.00 | 1.00 | 1.00   | 1.00 | 1.00 | 1.00  | 1.00  | 1.00   | 1.00    |
| 4 hours      | 3.37* | 1.26 | 0.51 | 1.01 | 0.27* | 0.60   | 1.37  | 1.03  | 4.97* | 0.48* | 0.82   | 0.45 | 0.14* | 0.45 | 0.46 | 0.62*  | 0.98 | 0.58 | 0.42  | 1.90* | 0.44   | 0.33    |
| 12 hours     | 2.00* | 0.86 | 0.68 | 1.99 | 0.40* | 0.79   | 2.21* | 1.62* | 7.16* | 0.61  | 2.28*  | 0.55 | 0.11* | 0.78 | 0.64 | 0.85   | 0.86 | 0.85 | 0.57  | 1.10  | 0.65   | 0.64    |
| 18 hours     | 1.44  | 1.04 | 0.66 | 1.19 | 0.34* | 0.62   | 1.39  | 1.38  | 6.43* | 0.49  | 1.42   | 0.45 | 0.09* | 0.51 | 0.55 | 0.88   | 0.76 | 0.68 | 0.52  | 1.06  | 0.52   | 1.16    |
| 24 hours     | 1.01  | 1.12 | 1.04 | 1.02 | 0.66  | 1.13   | 1.30  | 1.75* | 6.06* | 0.87  | 1.97*  | 0.89 | 0.38* | 1.27 | 1.09 | 1.19   | 1.33 | 1.14 | 1.01  | 0.96  | 1.16   | 1.70*   |
| scale        | 0.20  | 0.50 | 1.00 | 2.00 | 5.00  | 10.00  | 20.00 |       |       |       |        |      |       |      |      |        |      |      |       |       |        |         |

**Table S1.** Number of individual tissue samples used for human cDNA preparations.

| Human Organs    | No. of individuals |
|-----------------|--------------------|
| Lung            | 1                  |
| Liver           | 1                  |
| Kidney          | 4                  |
| Small Intestine | 32                 |
| Colon           | 5                  |
| Testis          | 45                 |
| Spleen          | 3                  |
| Thymus          | 9                  |
| Brain           | 8                  |
| Heart           | 3                  |

**Table S2.** (1) Descriptive statistics for murine healthy tissue housekeeping genes based on their crossing point (Cp) values.

|          | <b>18S</b> | <b>GAPDH</b> |
|----------|------------|--------------|
| N        | 10         | 10           |
| GM       | 9.73       | 17.65        |
| AM       | 9.75       | 17.66        |
| Minimum  | 8.81       | 16.54        |
| Maximum  | 10.98      | 18.91        |
| SD       | 0.74       | 0.77         |
| Variance | 0.55       | 0.59         |
| CV       | 0.05       | 0.10         |

**Table S2.** (2) Descriptive statistics for human healthy tissue GAPDH based on their Cp values.

|          | <b>GAPDH</b> |
|----------|--------------|
| N        | 10           |
| GM       | 25.76        |
| AM       | 25.83        |
| Minimum  | 22.69        |
| Maximum  | 29.10        |
| SD       | 2.02         |
| Variance | 4.08         |
| CV       | 1.05         |

**Table S2.** (3) Descriptive statistics of 18s housekeeping gene in IRI model based on Cp values.

|          | <b>18S</b> |
|----------|------------|
| N        | 42         |
| GM       | 10.11      |
| AM       | 10.12      |
| Minimum  | 8.99       |
| Maximum  | 11.20      |
| SD       | 0.48       |
| Variance | 0.23       |
| CV       | 0.02       |

**Table S2.** (4) Descriptive statistics of 18s housekeeping gene in LPS stimulations based on Cp values in both species.

|          | <b>18S human</b> | <b>18S murine</b> |
|----------|------------------|-------------------|
| N        | 24               | 24                |
| GM       | 12.28            | 11.06             |
| AM       | 12.30            | 11.11             |
| Minimum  | 10.94            | 9.38              |
| Maximum  | 13.26            | 13.75             |
| SD       | 0.61             | 1.09              |
| Variance | 0.38             | 1.18              |
| CV       | 0.05             | 0.13              |
